# Supplementary material for: Nanocrystalline zinc peroxide mediated unprecedented nitrene transfer: an expeditious access to N-tosylaziridines
Source: Royal Society of Chemistry journal article supplement (doi:10.1039/c3ra43878c), 2013-01-01
Supplement: c3ra43878c.pdf [file c3ra43878c.pdf]

## Supporting information

### **Nanocrystalline Zinc peroxide mediated unprecedented nitrene transfer: an expeditious access to aziridines.**

Sanny Verma and Suman L. Jain

*Chemical Sciences Division, CSIR-Indian Institute of Petroleum*

*Mohkampur, Dehradun-248005 (India)*

Email: [suman@iip.res.in](mailto:suman@iip.res.in)

### **Synthesis and characterization of Nanocrystalline ZnO<sub>2</sub>**

***Synthesis of nanocrystalline ZnO<sub>2</sub><sup>1</sup>***: A solution of Zn(CH<sub>3</sub>COO)<sub>2</sub>·2H<sub>2</sub>O(1g) in deionized water (50 mL) was added H<sub>2</sub>O<sub>2</sub> (5 mL, 30 wt %). The resulting mixture was stirred overnight at room temperature and then separated by filtration. The resulting fine powder was washed with deionized water and dried at 60 °C for 3 days to afford nanocrystalline ZnO<sub>2</sub> .

The synthesized nanocrystalline zinc peroxide was characterized with various techniques. The FT-IR spectrum<sup>2</sup> of nanocrystalline ZnO<sub>2</sub> is presented in Figure 1, which reveals the characteristic band of Zn-O at 430 cm<sup>-1</sup>. The signature band of the O-O stretching is observed at 1020 cm<sup>-1</sup> and the presence of bands in the range of 3431.4 cm<sup>-1</sup> and 1573.1 cm<sup>-1</sup> attributed to the OH stretching and bending modes of water respectively.

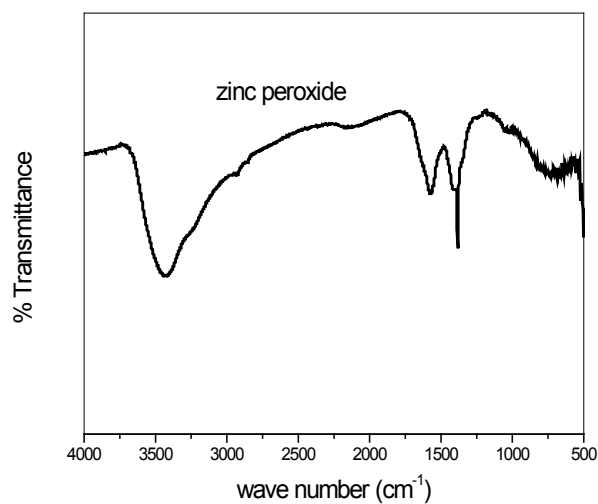

Fig. 1: FTIR of nanocrystalline zinc peroxide

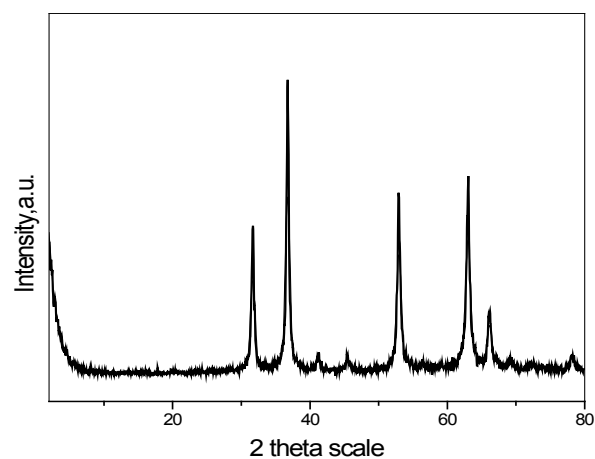

Fig.2 XRD pattern of nanocrystalline zinc peroxide

Figure 2 shows the XRD pattern of the synthesized nanocrystalline zinc peroxide which was found to be similar to the XRD pattern as described in literature.<sup>2,3</sup>

The morphological feature of the prepared nanocrystalline material was determined by Field Emission Scanning Electron Microscopy (FESEM). The FE-SEM images shown in Figure 3

shows, the nanoparticles of zinc peroxide are approximately 50-100 nm and are of aggregated type.<sup>2</sup>

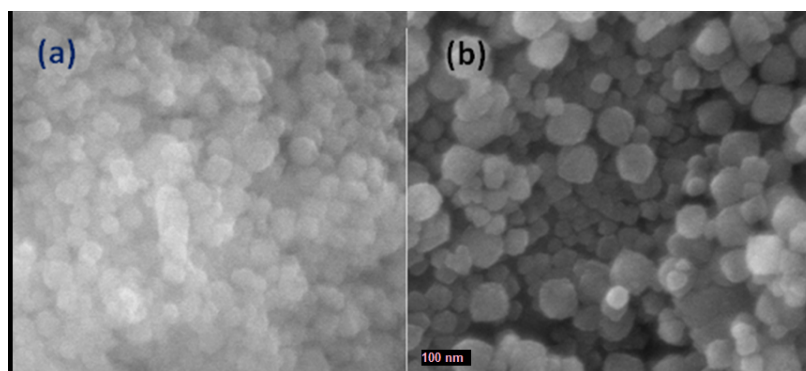

Figure 3: (a) Low- and (b) high-magnification FE-SEM images of nanocrystalline zinc peroxide

The thermal behavior of the as-prepared  $\text{ZnO}_2$  nanocrystals was investigated by TG–DSC analysis. The TG curve in Fig. 4 shows that the weight loss below 180 °C was about 12%, which was attributed to the release of surface-adsorbed/bound water. The major weight loss was found in the range of 180–350 °C in the TG curve, which could be due to the decomposition of  $\text{ZnO}_2$  into ZnO and oxygen ( $2\text{ZnO}_2 = 2\text{ZnO} + \text{O}_2$ ) as suggested in the literature.<sup>2</sup> In addition, the DSC curve in Fig. 4 exhibited a strong exothermic peak at around 244 °C, corresponding to the decomposition of  $\text{ZnO}_2$  into ZnO and  $\text{O}_2$ . It is very important to recognize that anionic substitution of  $\text{ZnO}_2$  at high temperature cannot be performed easily as it is known to liberate oxygen violently on heating at around 244°C.<sup>2</sup>

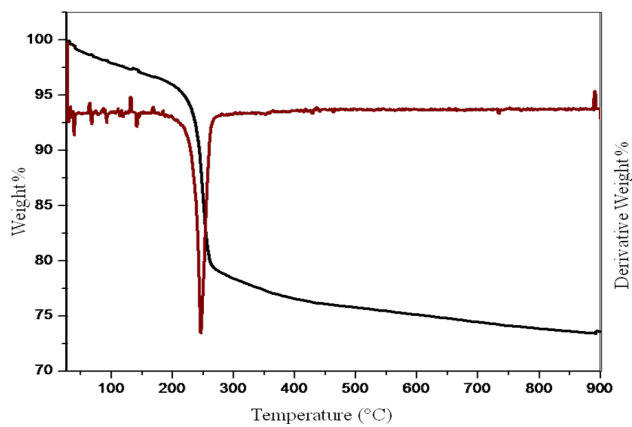

Fig. 4: TG-DSC curve of nanocrystalline ZnO<sub>2</sub>

## $^1\text{H}$ and $^{13}\text{C}$ NMR of $\text{Ph}_3\text{P}=\text{NTs}$

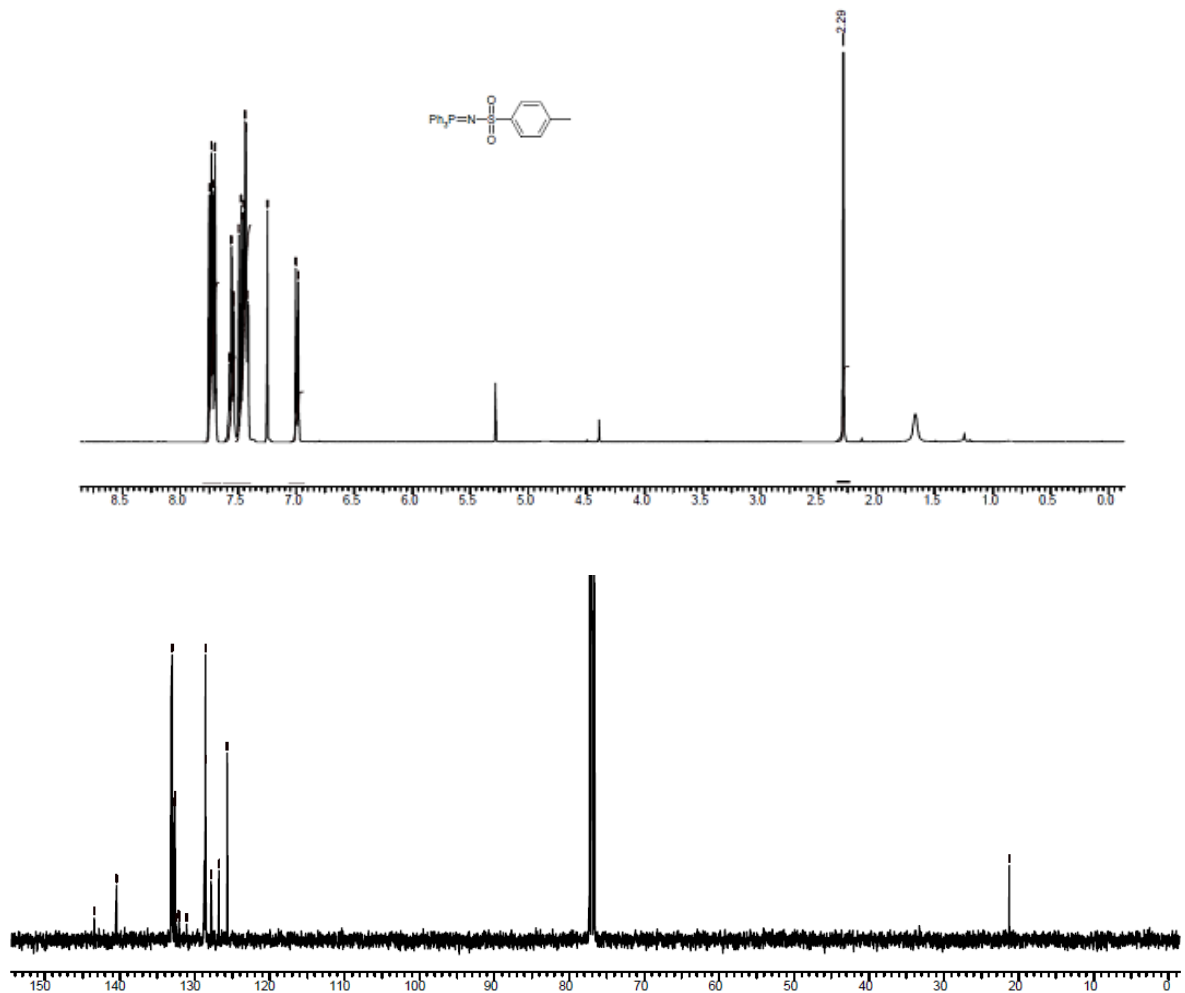

**Table 1, entry 12** (Aziridination of *cis*-2-hexene)

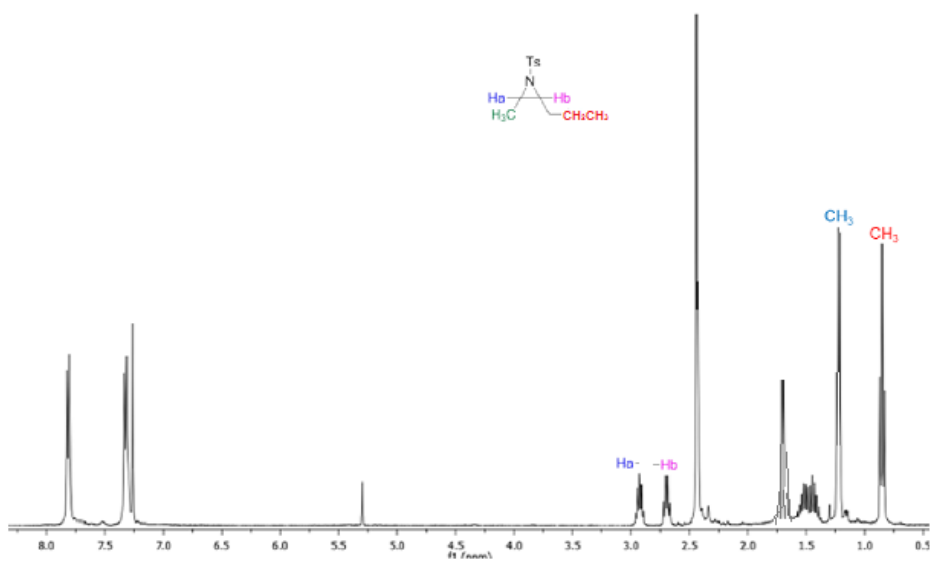

**Table 1, entry 13** (Aziridination of *trans*-2-hexene)

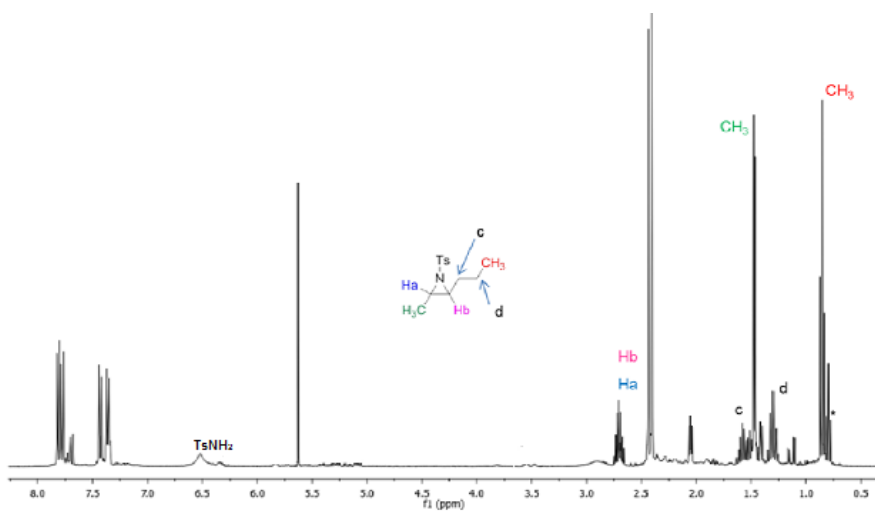

## References

1. a) Sun, M.; Hao, W.; Wang, C.; Wang, T. *Chem. Phys. Lett.* **2007**, 443, 342–346.; b) Ahmad, S.; Kharkwal, M.; Govind, N. R. *J. Phys. Chem. C* **2011**, 115, 10131–10139.
2. Cheng, S. ; Yan, D.; Chen, J. T.; Zhuo, R. F ; Feng, J. J. ; Li, H. J.; Feng, H. T.; Yan, P. X. *J. Phys. Chem. C* **2009**, 113, 13630–13635.
3. Chen, W.; Lu, Y. H.; Wang, M.; Kroner, L.; Paul, H.; Fecht, H.-J.; Bednarcik, J.; Stahl, K.; Zhang, Z. L.; Wiedwald, U.; Kaiser, U.; Ziemann, P.; Kikegawa, T.; Wu, O C. D.; Jiang, J. Z. *J. Phys. Chem. C* **2009**, 113, 1320–1324.
